# Supplementary material for: Higher entropy observed in SARS-CoV-2 genomes from the first COVID-19 wave in Pakistan
Source: PLoS One. 2021 Aug 31;16(8):e0256451. doi: 10.1371/journal.pone.0256451 (PMC8407562; doi:10.1371/journal.pone.0256451)
Supplement: S1 Table — (XLSX) [file pone.0256451.s006.xlsx]

## Sheet: revised
S1 Table. Description of SARS-CoV-2 cases from Pakistan
ID	GenBank accession number	Genome	Length (kb)	Demographic information						Lineage
				Date	Sample (city)	Sample (Province)	Travel History	Age	Sex	Type	Lineage	Clade	Nextstrain clade
hCoV-19/Pakistan/Gilgit1/2020	MT240479	complete	29836	2020-03-04	Gilgit	KPK	local	NA	NA	I	B	L	19A
hCov-19/Pakistan/AKU-2/2020	MT730114	complete	29903	2020-03-10	Karachi	Sindh	Iran	26	Male	VIa	B.1.255	GH	20A
hCoV-19/Pakistan/Manga-KPK/2020	MT262993	complete	29836	2020-03-12	Manga	KPK	local	NA	NA	I	B.6	L	19A
hCov-19/Pakistan/AKU-58/2020	MW433736	complete	29846	2020-03-16	Karachi	Sindh	local	50	Female	V	B.4	V	19A
hCov-19/Pakistan/AKU-59/2020	MW433740	complete	29845	2020-03-16	Karachi	Sindh	local	50	Female	V	B.4	V	19A
hCoV-19/Pakistan/KHI1/2020	MT500122	complete	29819	2020-03-16	Karachi	Sindh	local	NA	NA	I	B	L	19A
hCov-19/Pakistan/AKU-70/2020	-	partial	-	2020-03-18	Karachi	Sindh	local	25	Female	VIa	-	GH	-
hCov-19/Pakistan/AKU-3/2020	MT730115	complete	29842	2020-03-19	Karachi	Sindh	Iran	51	Male	VIa	B.1.255	GH	20A
hCov-19/Pakistan/AKU-11/2020	MT730117	complete	29854	2020-03-19	Karachi	Sindh	Iran	12	Male	II	A	S	19B
hCov-19/Pakistan/AKU-10/2020	MT730116	complete	29839	2020-03-20	Karachi	Sindh	Turkey	22	Female	II	A	S	19B
hCov-19/Pakistan/AKU-5/2020	MT731278	complete	29693	2020-03-22	Karachi	Sindh	Turkey	27	Male	VIa	B.1	GH	20C
hCoV-19/Pakistan/KP-RMI-01/2020	MW242667	complete	29899	2020-04-01	Peshawer	KPK	local	NA	NA	I	B.6	L	19A
hCov-19/Pakistan/AKU-67/2020	-	partial	-	2020-05-02	Ghotki	Sindh	local	44	Male	VIa	-	GH	-
hCov-19/Pakistan/AKU-57/2020	MW433725	complete	29859	2020-05-03	Karachi	Sindh	local	30	Male	I	B.6	L	19A
hCoV-19/Pakistan/JRCGR-KHI22/2020	EPI_ISL_779257	complete	29903	2020-05-03	Karachi	Sindh	local	NA	NA		B.1	GH	20A
hCov-19/Pakistan/AKU-23/2020	MT731277	complete	29773	2020-05-10	Karachi	Sindh	Punjab	54	Male	I	B.6	L	19A
hCoV-19/Pakistan/UN-UVAS-Lahore-VI/2020	MW031799	complete	29903	2020-05-11	Lahore	Punjab	local	NA	NA	VIb	B.1.1.1	GR	20B
hCoV-19/Pakistan/UN-UVAS-Lahore-II/2020	MW031800	complete	29903	2020-05-11	Lahore	Punjab	local	NA	NA	VIb	B.1.1.1	GR	20B
hCoV-19/Pakistan/UN-UVAS-Lahore-III/2020	MW031801	complete	29903	2020-05-11	Lahore	Punjab	local	NA	NA	VIb	B.1.1.1	GR	20B
hCoV-19/Pakistan/UN-UVAS-LAHORE-I?	MW031802	complete	29903	2020-05-11	Lahore	Punjab	local	NA	NA	VIb	B.1.1.1	GR	20B
hCoV-19/Pakistan/UN-UVAS-SIALKOT	MW031803	complete	29903	2020-05-12	Sialkot	Punjab	local	NA	NA	VIb	B.1.1	GR	20B
hCov-19/Pakistan/AKU-37/2020	MW433690	complete	29836	2020-05-14	Khairpur	Sindh	local	23	Male	VIa	B.1.160	GH	20A
hCov-19/Pakistan/AKU-39/2020	MW433716	complete	29843	2020-05-14	Khairpur	Sindh	local	48	Male	VIa	B.1	GH	20A
hCoV-19/Pakistan/KPK-KUST-SJTU/2020	MT879619	complete	29897	2020-05-15	Kohat	KPK	local	NA	NA	VIa	B.1	GH	20A
hCov-19/Pakistan/AKU-16/2020	-	partial	-	2020-05-19	Karachi	Sindh	local	84	Male	VI	-	G	-
hCov-19/Pakistan/AKU-21/2020	MT729995	complete	29838	2020-05-20	Karachi	Sindh	local	29	female	VIa	B.1	GH	20A
hCoV-19/Pakistan/JRCGR-KHI05/2020	EPI_ISL_779255	complete	29903	2020-05-20	Karachi	Sindh	local	NA	NA		B.1	GH	20C
hCoV-19/Pakistan/JRCGR-KHI06/2020	EPI_ISL_779256	complete	29889	2020-05-20	Karachi	Sindh	local	NA	NA		B.1.471	GH	20C
hCoV-19/Pakistan/JRCGR-KHI07/2020	EPI_ISL_779258	complete	29815	2020-05-20	Karachi	Sindh	local	NA	NA		B.1.471	GH	20C
hCov-19/Pakistan/AKU-33/2020	MW433687	complete	29854	2020-05-29	Karachi	Sindh	local	39	Female	VIa	B.1.160.4	GH	20A
PAK/NIH-44905/2020	EPI_ISL_468159	complete	29876	2020-06-02	Islamabad	ICT	local	NA	NA	II	A	S	19B
PAK/NIH-45143/2020	EPI_ISL_468160	complete	29877	2020-06-02	Rawalpindi	ICT	local	NA	NA	VIa	B.1.275	GH	20C
PAK/NIH-45090/2020	EPI_ISL_468161	complete	29880	2020-06-02	Islamabad	ICT	local	NA	NA	VIa	B.1.275	GH	20C
PAK/NIH-45579/2020	EPI_ISL_468162	complete	29880	2020-06-02	Islamabad	ICT	local	NA	NA	VIa	B.1	GH	20C
PAK/NIH-HAS001/2020	EPI_ISL_468163	complete	29881	2020-06-02	Islamabad	ICT	local	NA	NA	II	A	S	19B
hCoV-19/Pakistan/JRCGR-KHI26/2020	EPI_ISL_779260	complete	29896	2020-06-02	Karachi	Sindh	local	NA	NA		B.1.36	GH	20C
hCoV-19/Pakistan/JRCGR-KHI28/2020	EPI_ISL_779262	complete	29903	2020-06-02	Karachi	Sindh	local	NA	NA		B.1.36	GH	20C
hCoV-19/Pakistan/JRCGR-KHI29/2020	EPI_ISL_779265	complete	29896	2020-06-02	Karachi	Sindh	local	NA	NA		B.1.36	GH	20C
hCoV-19/Pakistan/JRCGR-KHI30/2020	EPI_ISL_779266	complete	29892	2020-06-02	Karachi	Sindh	local	NA	NA		B.1.471	GH	20C
hCoV-19/Pakistan/JRCGR-KHI40/2020	EPI_ISL_779267	complete	29903	2020-06-02	Karachi	Sindh	local	NA	NA		B.1.471	GH	20C
hCoV-19/Pakistan/JRCGR-KHI04/2020	EPI_ISL_779264	complete	29903	2020-06-03	Karachi	Sindh	local	NA	NA		A	S	19B
hCoV-19/Pakistan/JRCGR-KHI03/2020	EPI_ISL_779268	complete	29903	2020-06-03	Karachi	Sindh	local	NA	NA		B.1	GH	20C
hCoV-19/Pakistan/JRCGR-KHI02/2020	EPI_ISL_779269	complete	29896	2020-06-04	Karachi	Sindh	local	NA	NA		B.1.36	GH	20C
hCoV-19/Pakistan/NIH-64/2020	EPI_ISL_1385796	complete	29841	2020-06-06	Islamabad	ICT	local	NA	NA		B.1.36	GH	20C
hCoV-19/Pakistan/NIH-65/2020	EPI_ISL_1385798	complete	29842	2020-06-06	Islamabad	ICT	local	NA	NA		B.1	GH	20C
hCoV-19/Pakistan/NIH-66/2020	EPI_ISL_1406395	complete	29732	2020-06-06	Islamabad	ICT	local	NA	NA		B.1	GH	20C
hCoV-19/Pakistan/NIH-68/2020	EPI_ISL_1406397	complete	29840	2020-06-06	Islamabad	ICT	local	NA	NA		B.1.349	GH	20A
hCoV-19/Pakistan/NIBD-01-KHI/2020	EPI_ISL_708839	complete	29603	2020-06-06	Karachi	Sindh	local	NA	NA		B.1.36	GH	20C
hCoV-19/Pakistan/NIBD-02-KHI/2020	EPI_ISL_708840	complete	29603	2020-06-10	Karachi	Sindh	local	NA	NA		B.1.36	GH	20C
hCoV-19/Pakistan/JRCGR-KHI12/2020	EPI_ISL_779271	complete	29816	2020-06-14	Karachi	Sindh	local	NA	NA		B.1.471	GH	20C
hCoV-19/Pakistan/JRCGR-KHI11/2020	EPI_ISL_779279	complete	29825	2020-06-14	Karachi	Sindh	local	NA	NA		B.1.471	GH	20C
hCoV-19/Pakistan/JRCGR-KHI32/2020	EPI_ISL_779280	complete	29754	2020-06-14	Karachi	Sindh	local	NA	NA		B.1	GH	20A
hCoV-19/Pakistan/JRCGR-KHI33/2020	EPI_ISL_779288	complete	29903	2020-06-14	Karachi	Sindh	local	NA	NA		B.1.471	GH	20C
hCov-19/Pakistan/AKU-24/2020	MW426405	complete	29859	2020-06-24	Karachi	Sindh	local	49	Male	VIa	B.1.36	GH	20A
hCov-19/Pakistan/AKU-25/2020	MW490572	complete	29857	2020-06-24	Karachi	Sindh	local	35	Female	VIa	B.1.160.4	GH	20A
hCov-19/Pakistan/AKU-26/2020	MW428254	complete	29847	2020-06-24	Karachi	Sindh	local	16	Female	VIa	B.1.160.4	GH	20A
hCov-19/Pakistan/AKU-27/2020	MW433685	complete	29848	2020-06-24	Karachi	Sindh	local	6	Male	VIa	B.1.255	GH	20A
hCoV-19/Pakistan/JRCGR-KHI18/2020	EPI_ISL_779272	complete	29871	2020-07-02	Karachi	Sindh	local	NA	NA		B.1.260	O	19A
hCoV-19/Pakistan/JRCGR-KHI20/2020	EPI_ISL_779276	complete	29554	2020-07-02	Karachi	Sindh	local	NA	NA		B	L	19A
hCoV-19/Pakistan/JRCGR-KHI42/2020	EPI_ISL_779289	complete	29903	2020-07-02	Karachi	Sindh	local	NA	NA		B.1.471	GH	20C
hCoV-19/Pakistan/JRCGR-KHI17/2020	EPI_ISL_779290	complete	29903	2020-07-02	Karachi	Sindh	local	NA	NA		B.1.36	GH	20C
hCoV-19/Pakistan/NIH-76/2020	EPI_ISL_1385800	complete	29732	2020-07-07	Islamabad	ICT	local	NA	NA		B.1	GH	20A
hCoV-19/Pakistan/NIH-77/2020	EPI_ISL_1385802	complete	29835	2020-07-07	Islamabad	ICT	local	NA	NA		B.1.1.1	GR	20D
hCoV-19/Pakistan/NIH-78/2020	EPI_ISL_1385806	complete	29843	2020-07-07	Islamabad	ICT	local	NA	NA		B.1	GH	20A
hCoV-19/Pakistan/NIH-79/2020	EPI_ISL_1385808	complete	29778	2020-07-07	Islamabad	ICT	local	NA	NA		B.1.1.1	GR	20D
hCoV-19/Pakistan/NIH-95/2020	EPI_ISL_1385812	complete	29838	2020-07-07	Islamabad	ICT	local	NA	NA		B.1	GH	20A
hCoV-19/Pakistan/NIH-70/2020	EPI_ISL_1406400	complete	29738	2020-07-07	Islamabad	ICT	local	NA	NA		B.1	GH	20C
hCov-19/Pakistan/AKU-63/2020	-	partial	-	2020-07-09	Karachi	Sindh	local	31	Male	I	-	L	-
hCov-19/Pakistan/AKU-64/2020	MW433741	complete	29848	2020-07-10	Karachi	Sindh	local	60	Female	VIb	B.1.1.105	GR	20B
hCov-19/Pakistan/AKU-66/2020	-	partial	-	2020-07-11	Umerkot	Sindh	local	49	Male	VIa	-	GH	-
hCov-19/Pakistan/AKU-65/2020	-	partial	-	2020-07-13	Badin	Sindh	local	35	Female	I	-	L	-
hCov-19/Pakistan/AKU-47/2020	MW433721	complete	29852	2020-07-24	Karachi	Sindh	local	34	Female	VIa	B.1.36	GH	20A
hCoV-19/Pakistan/JRCGR-KHI48/2020	EPI_ISL_779281	complete	29667	2020-08-04	Karachi	Sindh	local	NA	NA		B.1.471	GH	20C
hCov-19/Pakistan/AKU-46/2020	MW433718	complete	29853	2020-08-05	Karachi	Sindh	local	9	Female	VIa	B.1.36.6	GH	20A
hCoV-19/Pakistan/JRCGR-KHI15/2020	EPI_ISL_779275	complete	29903	2020-08-10	Karachi	Sindh	local	NA	NA		B.1.471	GH	20C
hCoV-19/Pakistan/JRCGR-KHI35/2020	EPI_ISL_779277	complete	29766	2020-08-10	Karachi	Sindh	local	NA	NA		B.1.36	GH	20C
hCoV-19/Pakistan/JRCGR-KHI45/2020	EPI_ISL_779282	complete	29881	2020-08-10	Karachi	Sindh	local	NA	NA		B.1.471	GH	20C
hCoV-19/Pakistan/JRCGR-KHI37/2020	EPI_ISL_779283	complete	29874	2020-08-10	Karachi	Sindh	local	NA	NA		B.1.36	GH	20C
hCoV-19/Pakistan/JRCGR-KHI13/2020	EPI_ISL_779284	complete	29883	2020-08-10	Karachi	Sindh	local	NA	NA		B.1	GH	20C
hCoV-19/Pakistan/JRCGR-KHI47/2020	EPI_ISL_779285	complete	29903	2020-08-10	Karachi	Sindh	local	NA	NA		B.1.36	GH	20C
hCoV-19/Pakistan/JRCGR-KHI16/2020	EPI_ISL_779286	complete	29839	2020-08-10	Karachi	Sindh	local	NA	NA		B.1.471	GH	20C
hCoV-19/Pakistan/JRCGR-KHI41/2020	EPI_ISL_779287	complete	29903	2020-08-10	Karachi	Sindh	local	NA	NA		B.1.471	GH	20C
hCoV-19/Pakistan/NIH-62/2020	EPI_ISL_1385791	complete	29843	2020-09-09	Islamabad	ICT	local	NA	NA		B.1.1.1	GR	20D
hCoV-19/Pakistan/NIH-60/2020	EPI_ISL_1406394	complete	29835	2020-09-09	Islamabad	ICT	local	NA	NA		B.1.471	GH	20C
hCov-19/Pakistan/AKU-52/2020	-	partial	-	2020-09-29	Karachi	Sindh	local	81	Male	I	-	L	-
hCov-19/Pakistan/AKU-50/2020	-	partial	-	2020-09-30	Karachi	Sindh	local	34	Female	I	-	L	-
hCov-19/Pakistan/AKU-51/2020	-	partial	-	2020-09-30	Karachi	Sindh	local	28	Female	I	-	L	-
hCov-19/Pakistan/AKU-56/2020	MW433723	complete	29831	2020-10-09	Karachi	Sindh	local	52	Male	VIa	B.1.160.4	GH	20A
hCov-19/Pakistan/AKU-55/2020	-	partial	-	2020-10-09	Karachi	Sindh	local	52	Male	I	-	L	-
hCov-19/Pakistan/AKU-54/2020	-	partial	-	2020-10-13	Karachi	Sindh	local	75	Female	VIa	-	GH	-
(-) NA, not available; *, lineage andclades identified through Pengolin and Nextstrain database analysis; NGS was run on Illumina sequencing platform; ICT:Islamabad Capital Territory
